# Supplementary material for: Hybrid organic–inorganic chlorozincate and a molecular zinc complex involving the in situ formed imidazo[1,5-a]pyridinium cation: serendipitous oxidative cyclization, structures and photophysical properties
Source: Royal Society of Chemistry journal article supplement (doi:10.1039/c5dt01491c), 2015-01-01
Supplement: c5dt01491c1.pdf [file c5dt01491c1.pdf]

**Hybrid organic-inorganic chlorozincate and molecular zinc complex involving *in situ* formed imidazo[1,5-*a*]pyridinium cation: serendipitous oxidative cyclization, structures and photophysical properties**

Elena A. Buvaylo, Vladimir N. Kokozay, Rostyslav P. Linnik, Olga Yu. Vassilyeva, and Brian W. Skelton

**Supplementary data**

**Table S1** Selected bond distances (Å) for the pendant pyridyl moieties of L in **1**, **2** and **3**

|           | <b>1</b> | <b>2</b>   | <b>3</b> |
|-----------|----------|------------|----------|
| C131–N132 | 1.344(3) | 1.3473(9)  | 1.348(2) |
| C131–C136 | 1.390(3) | 1.3872(11) | 1.389(2) |
| N132–C133 | 1.340(3) | 1.3442(9)  | 1.336(2) |
| C133–C134 | 1.388(3) | 1.3885(11) | 1.391(3) |
| C134–C135 | 1.375(3) | 1.3813(13) | 1.381(3) |
| C135–C136 | 1.383(3) | 1.3941(13) | 1.389(3) |
| C231–N232 | 1.348(3) |            | 1.341(2) |
| C231–C236 | 1.391(3) |            | 1.390(2) |
| N232–C233 | 1.331(3) |            | 1.333(2) |
| C233–C234 | 1.382(3) |            | 1.389(3) |
| C234–C235 | 1.383(3) |            | 1.377(3) |
| C235–C236 | 1.386(3) |            | 1.383(3) |

**Table S2** Selected bond angles (°) for the imidazo[1,5-*a*]pyridine moieties of L in **1**, **2** and **3**

|               | <b>1</b>   | <b>2</b>  | <b>3</b>   |
|---------------|------------|-----------|------------|
| L1            |            |           |            |
| C13–N12–C11   | 110.80(19) | 110.56(6) | 110.63(15) |
| C13–N12–C12   | 126.94(19) | 124.56(6) | 126.17(15) |
| C11–N12–C12   | 122.20(19) | 124.34(7) | 123.11(15) |
| C13–N13A–C14  | 130.05(19) | 128.99(6) | 129.05(16) |
| C13–N13A–C17A | 109.25(18) | 109.07(6) | 109.31(15) |
| C14–N13A–C17A | 120.69(18) | 121.94(6) | 121.56(15) |
| L2            |            |           |            |
| C23–N22–C21   | 110.93(17) |           | 110.45(15) |
| C23–N22–C22   | 126.45(19) |           | 126.43(16) |

|               |            |            |
|---------------|------------|------------|
| C21–N22–C22   | 122.52(17) | 123.05(16) |
| C23–N23A–C24  | 129.60(18) | 129.53(15) |
| C23–N23A–C27A | 109.19(17) | 108.95(15) |
| C24–N23A–C27A | 121.21(17) | 121.47(15) |

**Table S3** Bond distances (Å) and angles (°) for the  $\text{ZnCl}_4^{2-}$  anion in **1** and  $\text{ZnCl}_3\text{N}$  moiety in **2**

|             | <b>1</b>  | <b>2</b>    |
|-------------|-----------|-------------|
| Zn1–Cl1     | 2.2771(5) | 2.2540(2)   |
| Zn1–Cl2     | 2.2734(6) | 2.22759(19) |
| Zn1–Cl3     | 2.3185(6) | 2.2440(2)   |
| Zn1–Cl4     | 2.2359(6) |             |
| Zn1–N32     |           | 2.1160(6)   |
| Cl1–Zn1–Cl3 | 106.72(2) | 117.20(2)   |
| Cl2–Zn1–Cl1 | 110.39(2) | 113.56(3)   |
| Cl2–Zn1–Cl3 | 103.11(2) | 111.23(2)   |
| Cl4–Zn1–Cl1 | 113.49(2) |             |
| Cl4–Zn1–Cl2 | 109.74(2) |             |
| Cl4–Zn1–Cl3 | 112.87(2) |             |
| N32–Zn1–Cl1 |           | 99.843(18)  |
| N32–Zn1–Cl2 |           | 113.484(17) |
| N32–Zn1–Cl3 |           | 100.209(18) |

**Table S4** C–H $\cdots$ Cl distances (Å) and angles (°) in **1–3**

| N        | Atom1* | Atom2     | Symm. op. 2     | Length | Angle  |
|----------|--------|-----------|-----------------|--------|--------|
| <b>1</b> |        |           |                 |        |        |
| 1        | Cl1    | H27–C27   | 1-x,1-y,2-z     | 2.881  | 141.92 |
| 2        | Cl1    | H16–C16   | 1/2-x,y-1/2,z   | 2.853  | 140.63 |
| 3        | Cl2    | H134–C134 | x,y,z           | 2.736  | 141.93 |
| 4        | Cl2    | H11–C11   | 1-x,y-1/2,3/2-z | 2.871  | 125.19 |
| 5        | Cl2    | H17–C17   | 1-x,y-1/2,3/2-z | 2.805  | 129.66 |
| 6        | Cl2    | H12A–C12  | x-1/2,y,3/2-z   | 2.782  | 173.50 |
| 7        | Cl2    | H235–C235 | x-1,y,z         | 2.745  | 164.83 |

|    |     |           |                   |       |        |
|----|-----|-----------|-------------------|-------|--------|
| 8  | C13 | H21–C21   | $1-x, 1-y, 2-z$   | 2.804 | 147.04 |
| 9  | C13 | H22B–C22  | $1-x, 1-y, 2-z$   | 2.821 | 151.83 |
| 10 | C13 | H26–C26   | $2-x, 1-y, 2-z$   | 2.913 | 167.16 |
| 11 | C13 | H233–C233 | $3/2-x, y-1/2, z$ | 2.896 | 141.26 |
| 12 | C14 | H24–C24   | $x, y, z$         | 2.847 | 129.37 |

**2**

|   |     |           |                       |       |        |
|---|-----|-----------|-----------------------|-------|--------|
| 1 | C11 | H12A–C12  | $x, y-1, z$           | 2.836 | 122.57 |
| 2 | C11 | H133–C133 | $1-x, y, 3/2-z$       | 2.949 | 131.83 |
| 3 | C11 | H14–C14   | $x, 1-y, z-1/2$       | 2.855 | 137.62 |
| 4 | C12 | H15–C15   | $x, 1-y, z-1/2$       | 2.763 | 153.25 |
| 5 | C12 | H11–C11   | $1/2-x, 1/2-y, 1-z$   | 2.689 | 137.76 |
| 6 | C12 | H17–C17   | $1/2-x, 1/2-y, 1-z$   | 2.874 | 136.13 |
| 7 | C12 | H16–C16   | $1/2-x, y-1/2, 1/2-z$ | 2.806 | 152.65 |
| 8 | C13 | H136–C136 | $x, y-1, z$           | 2.681 | 148.89 |

**3**

|   |     |           |                 |       |        |
|---|-----|-----------|-----------------|-------|--------|
| 1 | C11 | H133–C133 | $x+1, y, z$     | 2.948 | 155.73 |
| 2 | C11 | H12A–C12  | $x+1, y-1, z$   | 2.682 | 151.11 |
| 3 | C11 | H136–C136 | $x+1, y-1, z$   | 2.938 | 159.90 |
| 4 | C11 | H135–C135 | $1-x, 1-y, 1-z$ | 2.898 | 131.11 |
| 5 | C11 | H24–C24   | $x, y-1, z$     | 2.841 | 129.62 |
| 6 | C11 | H234–C234 | $-x, 1-y, 1-z$  | 2.839 | 139.48 |
| 7 | C12 | H15–C15   | $x+1, y, z$     | 2.686 | 166.24 |
| 8 | C12 | H11–C11   | $x, y-1, z$     | 2.651 | 167.67 |
| 9 | C12 | H16–C16   | $1-x, 1-y, -z$  | 2.950 | 154.08 |

---

\* Symm. op.  $x, y, z$

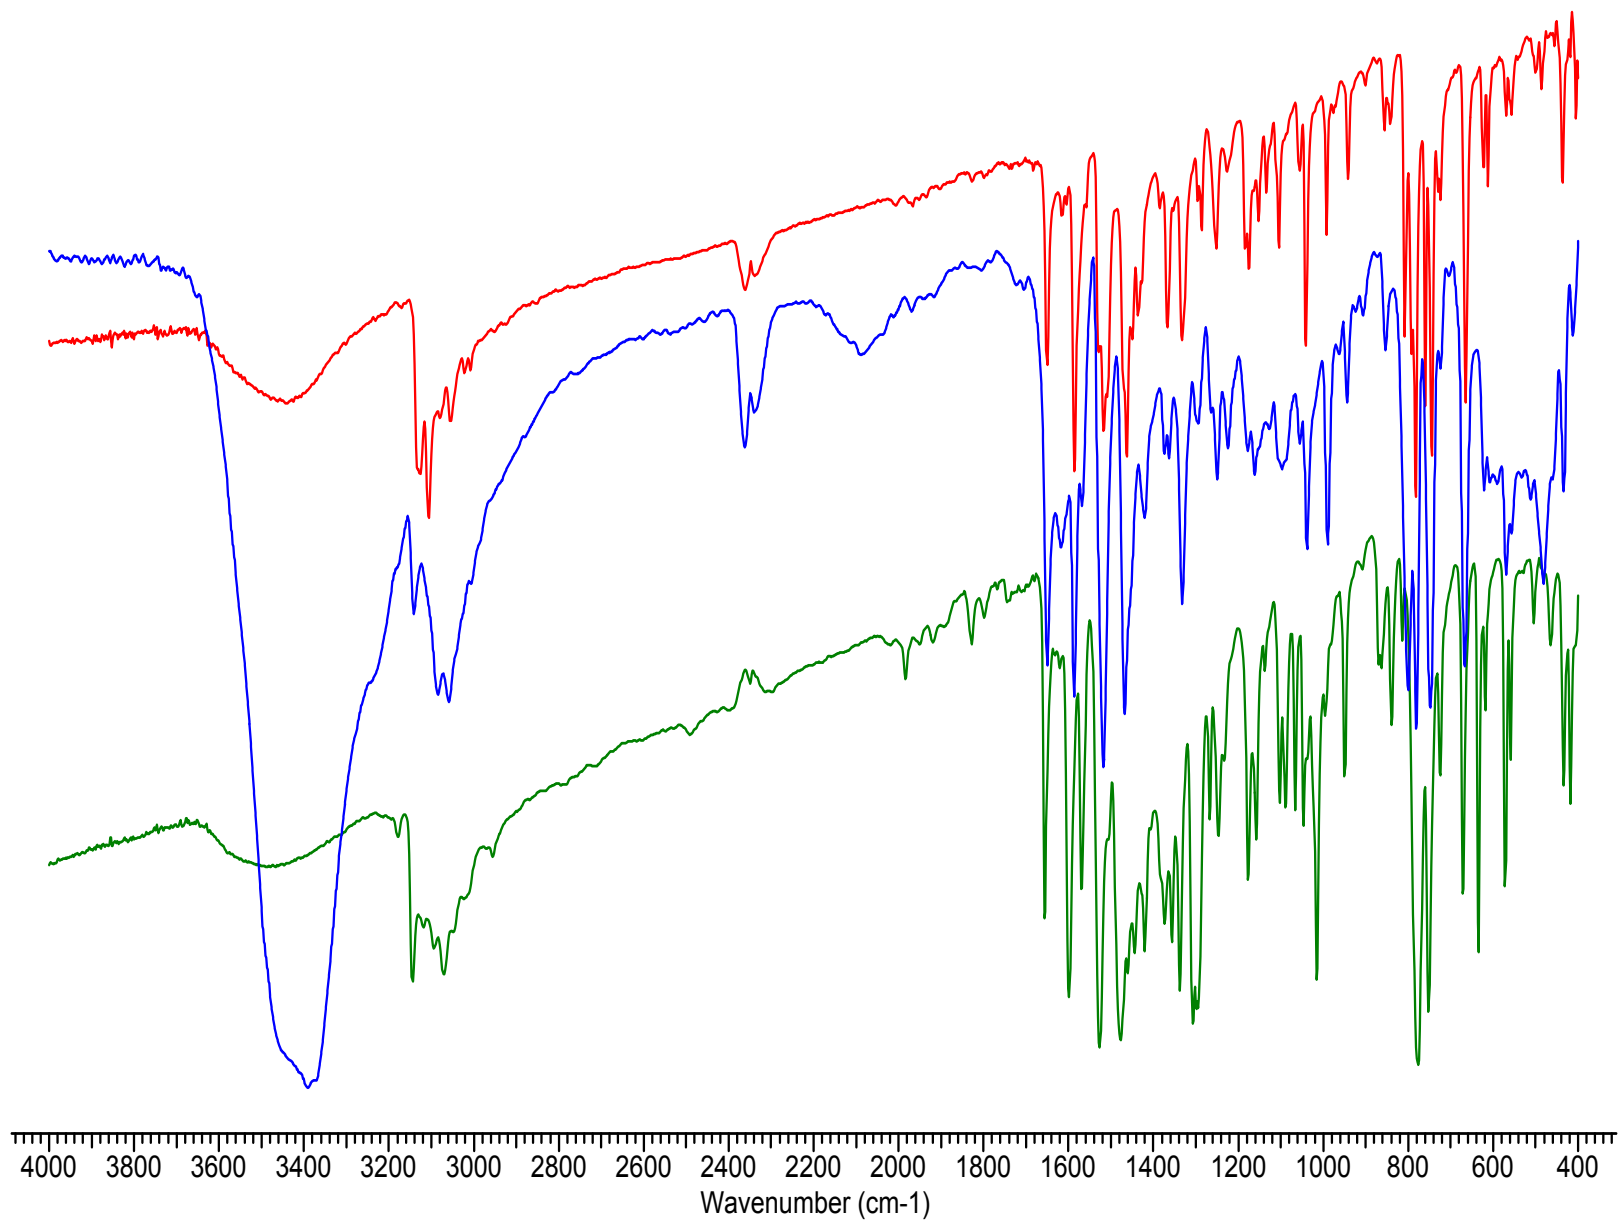

**Fig. S1** IR spectra of  $[L]_2[ZnCl_4]$  (**1**, green line),  $LZnCl_3$  (**2**, red line) and  $LCl \cdot 1.5H_2O$  (**3**, blue line) in the 4000–400 cm<sup>-1</sup> region.

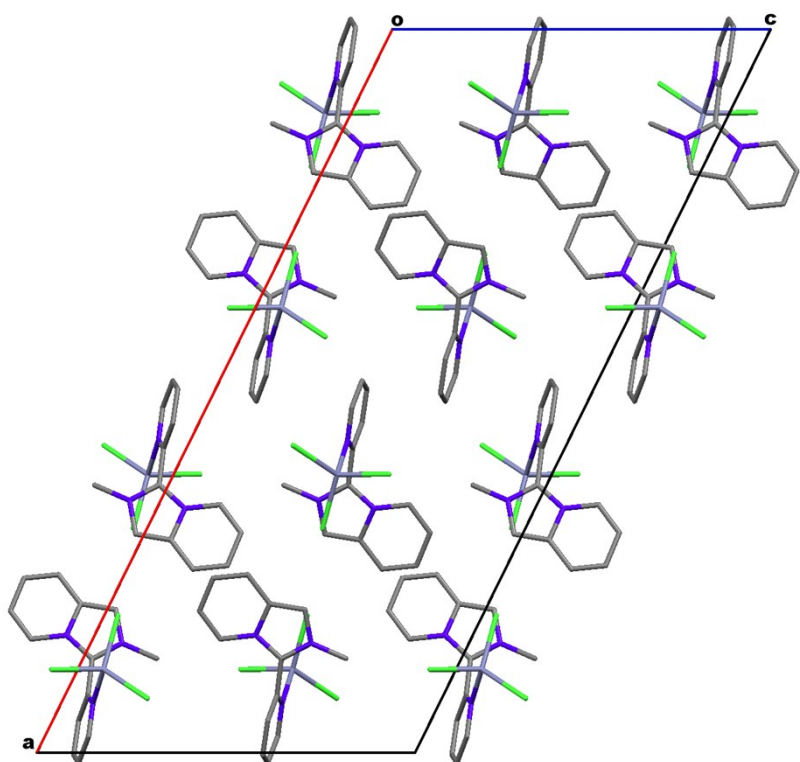

Fig. S2 Fragment of crystal packing of LZnCl<sub>3</sub> (2). The hydrogen atoms are not shown.

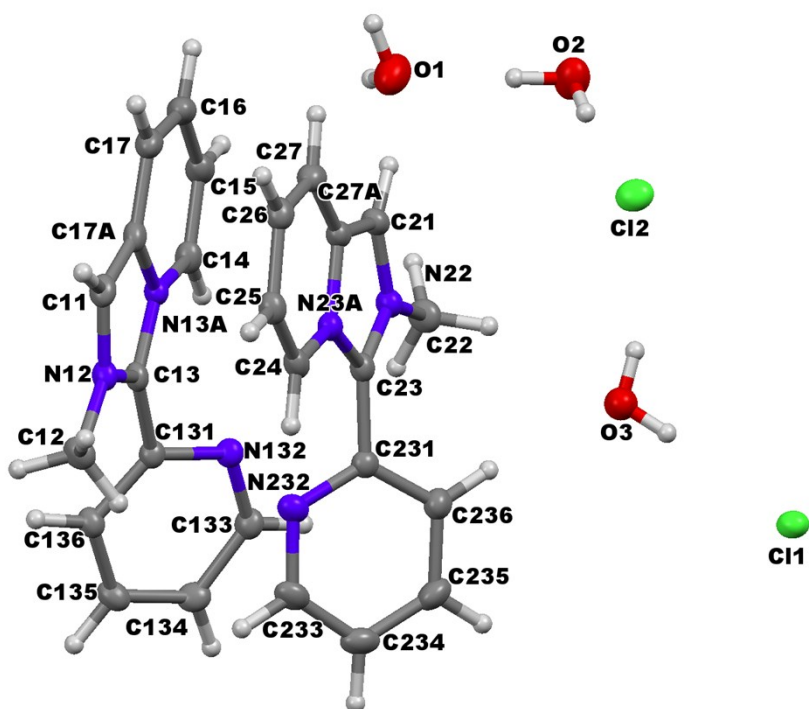

Fig. S3 Molecular structure and labelling of 3 with ellipsoids at the 50% probability level.

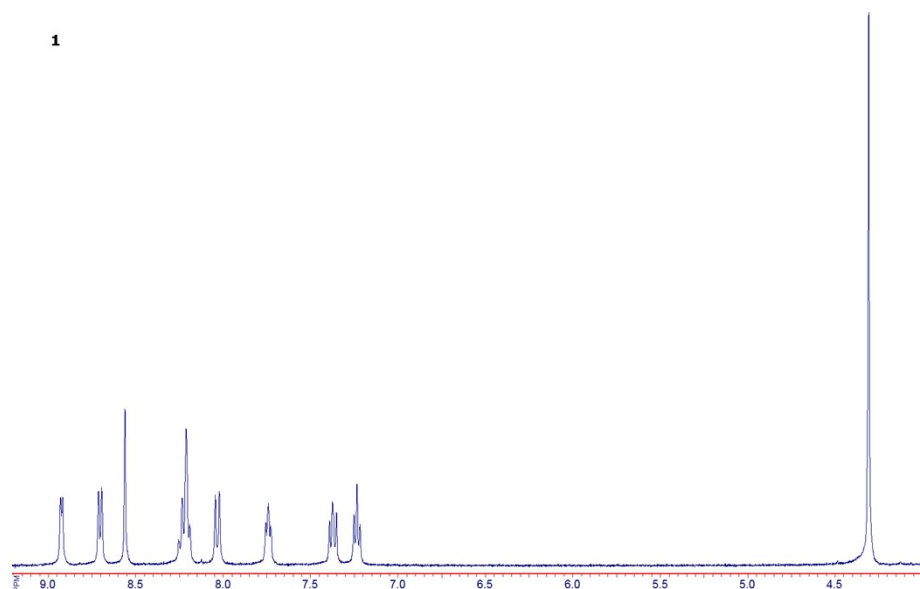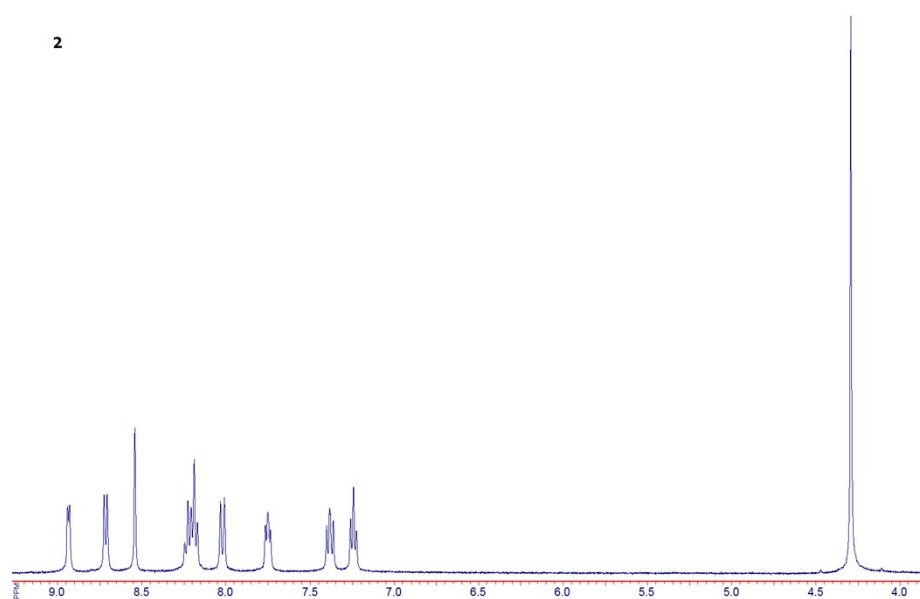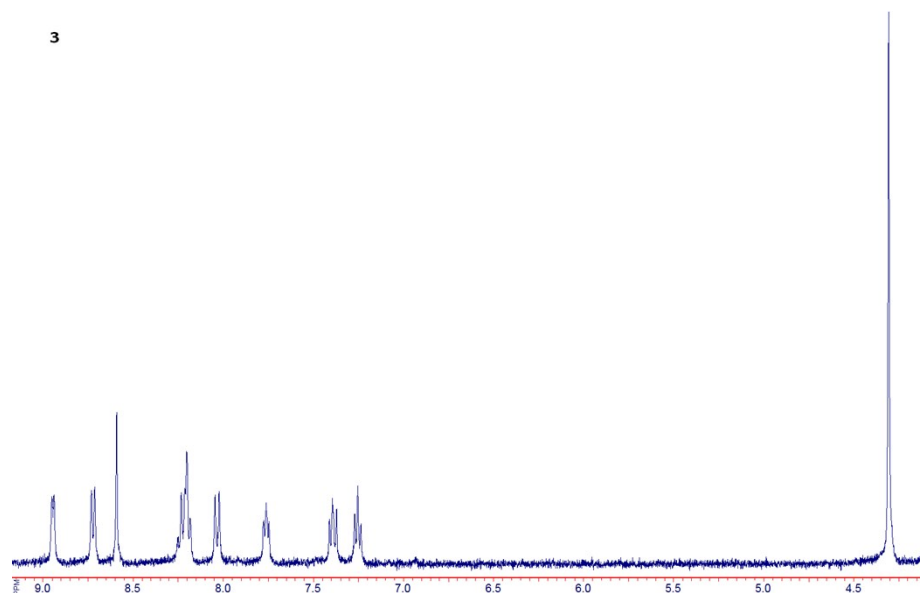

**Fig. S4** 400 MHz  $^1\text{H}$ NMR spectra of  $[\text{L}]_2[\text{ZnCl}_4]$  (**1**),  $\text{LZnCl}_3$  (**2**) and  $[\text{L}][\text{Cl}]\cdot 1.5\text{H}_2\text{O}$  (**3**) in  $\text{dms-}d_6$  at 293 K.
